# Supplementary material
Source: publisher figshare collection journal article supplement (https://tandf.figshare.com/articles/dataset/_/9919037)

# checkCIF/PLATON report

Structure factors have been supplied for datablock(s) phb157r

THIS REPORT IS FOR GUIDANCE ONLY. IF USED AS PART OF A REVIEW PROCEDURE FOR PUBLICATION, IT SHOULD NOT REPLACE THE EXPERTISE OF AN EXPERIENCED CRYSTALLOGRAPHIC REFEREE.

No syntax errors found.      CIF dictionary      Interpreting this report

## Datablock: phb157r

---

Bond precision:    C-C = 0.0061 Å                      Wavelength=0.71073

Cell:                      a=7.3486(3)              b=31.9323(13)              c=10.1572(4)  
                            alpha=90              beta=90              gamma=90  
Temperature:              296 K

|                | Calculated        | Reported          |
|----------------|-------------------|-------------------|
| Volume         | 2383.47(17)       | 2383.47(17)       |
| Space group    | P n m a           | P n m a           |
| Hall group     | -P 2ac 2n         | -P 2ac 2n         |
| Moiety formula | C18 H22 Ba N4 O12 | C18 H22 Ba N4 O12 |
| Sum formula    | C18 H22 Ba N4 O12 | C18 H22 Ba N4 O12 |
| Mr             | 623.73            | 623.73            |
| Dx,g cm-3      | 1.738             | 1.738             |
| Z              | 4                 | 4                 |
| Mu (mm-1)      | 1.735             | 1.735             |
| F000           | 1240.0            | 1240.0            |
| F000'          | 1239.37           |                   |
| h,k,lmax       | 8,37,12           | 8,37,12           |
| Nref           | 2134              | 2130              |
| Tmin,Tmax      | 0.812,0.917       | 0.637,0.745       |
| Tmin'          | 0.771             |                   |

Correction method= # Reported T Limits: Tmin=0.637 Tmax=0.745  
AbsCorr = MULTI-SCAN

Data completeness= 0.998                      Theta(max)= 25.000

R(reflections)= 0.0314( 1801)              wR2(reflections)= 0.0712( 2130)

S = 1.095                      Npar= 175

---

The following ALERTS were generated. Each ALERT has the format  
**test-name\_ALERT\_alert-type\_alert-level**.  
Click on the hyperlinks for more details of the test.

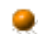

#### Alert level B

PLAT975\_ALERT\_2\_B Check Calcd Resid. Dens. 0.99A From O7 1.67 eA-3

**Author Response: The electron density peak is near to O7. By visual inspection of ellipsoid of O7, it is found that there is no disorder for O7. No other atom can be accounted for in this position. Since the crystal is a coordination polymer, this may be due to poor absorption correction in a heavy atom (Ba) structure.**

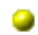

#### Alert level C

|                                                                    |             |
|--------------------------------------------------------------------|-------------|
| PLAT094_ALERT_2_C Ratio of Maximum / Minimum Residual Density .... | 3.08 Report |
| PLAT213_ALERT_2_C Atom O1 has ADP max/min Ratio .....              | 3.3 prolat  |
| PLAT220_ALERT_2_C Non-Solvent Resd 1 O Ueq(max)/Ueq(min) Range     | 4.7 Ratio   |
| PLAT241_ALERT_2_C High 'MainMol' Ueq as Compared to Neighbors of   | O5 Check    |
| PLAT242_ALERT_2_C Low 'MainMol' Ueq as Compared to Neighbors of    | Ba1 Check   |
| PLAT242_ALERT_2_C Low 'MainMol' Ueq as Compared to Neighbors of    | N2 Check    |
| PLAT250_ALERT_2_C Large U3/U1 Ratio for Average U(i,j) Tensor .... | 2.6 Note    |
| PLAT971_ALERT_2_C Check Calcd Resid. Dens. 0.99A From O7           | 1.67 eA-3   |

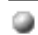

#### Alert level G

|                                                                    |             |
|--------------------------------------------------------------------|-------------|
| PLAT002_ALERT_2_G Number of Distance or Angle Restraints on AtSite | 6 Note      |
| PLAT004_ALERT_5_G Polymeric Structure Found with Maximum Dimension | 1 Info      |
| PLAT172_ALERT_4_G The CIF-Embedded .res File Contains DFIX Records | 1 Report    |
| PLAT380_ALERT_4_G Incorrectly? Oriented X(sp2)-Methyl Moiety ..... | C9 Check    |
| PLAT764_ALERT_4_G Overcomplete CIF Bond List Detected (Rep/Expd) . | 1.17 Ratio  |
| PLAT774_ALERT_1_G Suspect X-Y Bond in CIF: Ba1 --Ba1 ..            | 4.25 Ang.   |
| PLAT774_ALERT_1_G Suspect X-Y Bond in CIF: Ba1 --Ba1 ..            | 4.25 Ang.   |
| PLAT860_ALERT_3_G Number of Least-Squares Restraints .....         | 3 Note      |
| PLAT883_ALERT_1_G No Info/Value for _atom_sites_solution_primary . | Please Do ! |
| PLAT909_ALERT_3_G Percentage of I>2sig(I) Data at Theta(Max) Still | 71% Note    |
| PLAT910_ALERT_3_G Missing # of FCF Reflection(s) Below Theta(Min). | 4 Note      |
| PLAT978_ALERT_2_G Number C-C Bonds with Positive Residual Density. | 1 Info      |

- 0 **ALERT level A** = Most likely a serious problem - resolve or explain  
1 **ALERT level B** = A potentially serious problem, consider carefully  
8 **ALERT level C** = Check. Ensure it is not caused by an omission or oversight  
12 **ALERT level G** = General information/check it is not something unexpected
- 3 ALERT type 1 CIF construction/syntax error, inconsistent or missing data  
11 ALERT type 2 Indicator that the structure model may be wrong or deficient  
3 ALERT type 3 Indicator that the structure quality may be low  
3 ALERT type 4 Improvement, methodology, query or suggestion  
1 ALERT type 5 Informative message, check

It is advisable to attempt to resolve as many as possible of the alerts in all categories. Often the minor alerts point to easily fixed oversights, errors and omissions in your CIF or refinement strategy, so attention to these fine details can be worthwhile. In order to resolve some of the more serious problems it may be necessary to carry out additional measurements or structure refinements. However, the purpose of your study may justify the reported deviations and the more serious of these should normally be commented upon in the discussion or experimental section of a paper or in the "special\_details" fields of the CIF. checkCIF was carefully designed to identify outliers and unusual parameters, but every test has its limitations and alerts that are not important in a particular case may appear. Conversely, the absence of alerts does not guarantee there are no aspects of the results needing attention. It is up to the individual to critically assess their own results and, if necessary, seek expert advice.

### **Publication of your CIF in IUCr journals**

A basic structural check has been run on your CIF. These basic checks will be run on all CIFs submitted for publication in IUCr journals (*Acta Crystallographica*, *Journal of Applied Crystallography*, *Journal of Synchrotron Radiation*); however, if you intend to submit to *Acta Crystallographica Section C* or *E* or *IUCrData*, you should make sure that full publication checks are run on the final version of your CIF prior to submission.

### **Publication of your CIF in other journals**

Please refer to the *Notes for Authors* of the relevant journal for any special instructions relating to CIF submission.

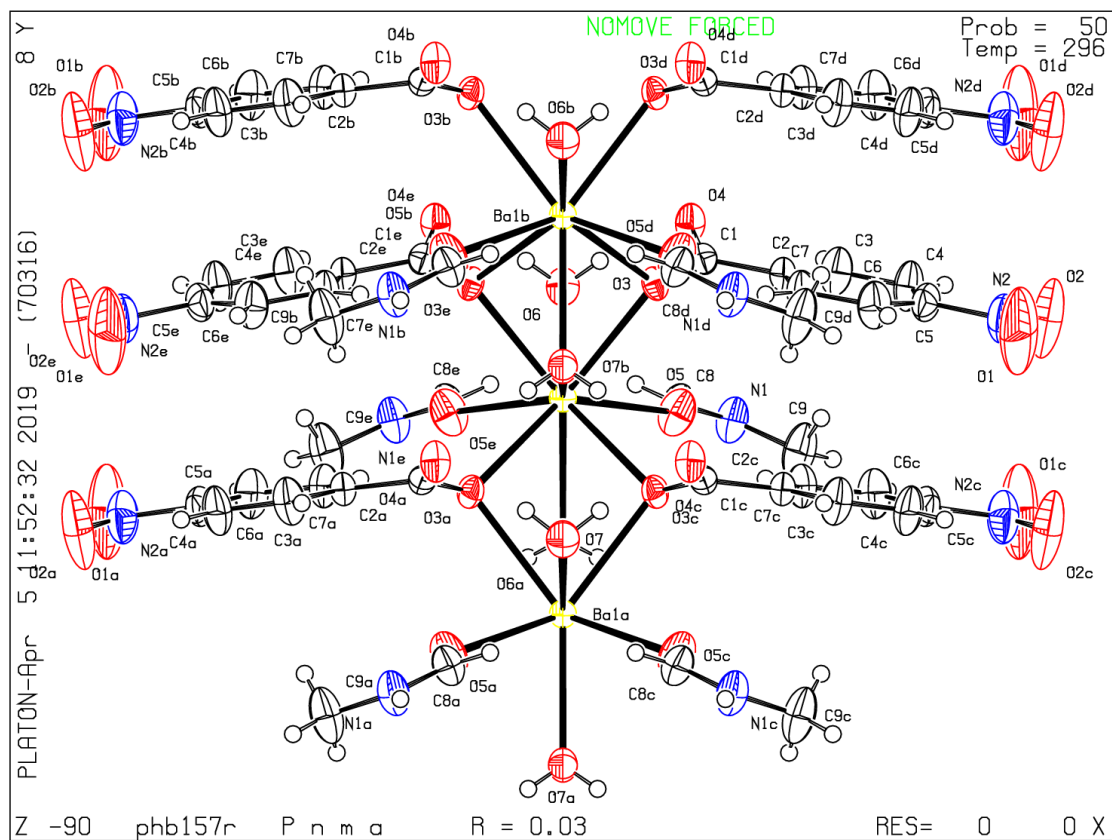

Supplement: Supplementary file 1 [file 1]
