# Supplementary material
Source: publisher figshare collection journal article supplement (https://tandf.figshare.com/articles/dataset/_/9919037)
Supplement: Supplementary file 2 [file 1]

Archive with 3 entries (3 files):
- Supplementary Material (CheckCIF report) GCOO_1666980[AU].pdf
- Supplementary Material (Table S1 &S2 Fig S1to S17) GCOO_1666980[AU].doc
- gcoo_a_1666980_sm3242.doc
